# Supplementary material for: Sequences in the cytoplasmic tail of SARS-CoV-2 Spike facilitate expression at the cell surface and syncytia formation
Source: PubMed Central journal article supplement (PMC8429659; doi:10.1038/s41467-021-25589-1), 2021-09-09
Supplement: 41467_2021_25589_MOESM3_ESM.pdf [file 41467_2021_25589_MOESM3_ESM.pdf]

## **Description of Additional Supplementary Files**

File Name: Supplementary Data 1

Description: Summary of mass spectrometry data. Values are provided for spectral counts, and for spectral intensity with the latter analysed using a statistical test was a two-sided t-test, without adjustments for multiple comparisons.

File Name: Supplementary Data 2

Description: Plasmids, primers and antibodies.

File Name: Supplementary Data 3

Description: Flow cytometry statistical analysis. Values are provided for the median values, along with the chi-squared tests for significance.
